# Supplementary material for: Micro Photosynthetic Power Cell Array for Energy Harvesting: Bio-Inspired Modeling, Testing and Verification
Source: MDPI journal article supplement (doi:10.3390/en17071749), 2024-04-05
Supplement: s1 [file s1]

# Micro Photosynthetic Power Cell Array for Energy Harvesting: Bio-Inspired Modeling, Testing and Verification

Kirankumar Kuruvinashetti <sup>1</sup>, Shanmuga Sundaram Pakkiriswami <sup>2</sup>, Dhilippan M.

Panneerselvam <sup>1</sup>, Muthukumaran Packirisamy <sup>1,\*</sup>

Supplementary information:

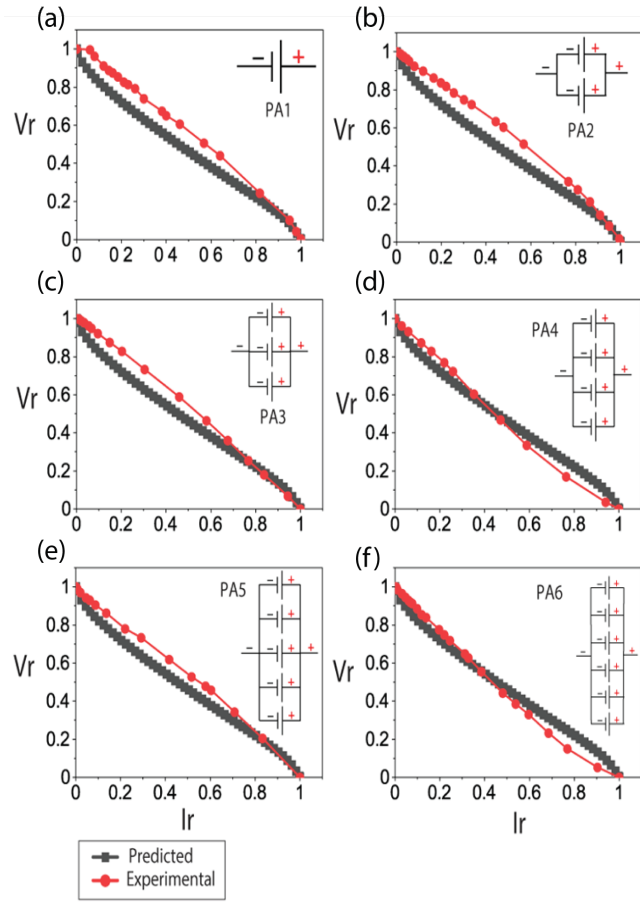

Figure S1: Normalized I-V characteristics of PA6 configuration (a) PA1 configuration (b) PA2 configuration (c) PA3 configuration (d) PA4 configuration (e) PA5 configuration (f) PA6 configuration. The red circles represent the experimental results; black squares represent the simulated (predicted results).

<sup>1</sup> Optical Bio Microsystems Laboratory, Department of Mechanical, Industrial and Aerospace Engineering, Concordia University, Montreal, QC H3G 1M8, Canada

<sup>2</sup> Department of Biochemistry and Molecular Biology, Dalhousie Medicine New Brunswick (DMNB), Dalhousie University, Saint John, NB E2L 4L5, Canada

\* **Correspondence:** pmuthu@alcor.concordia.ca

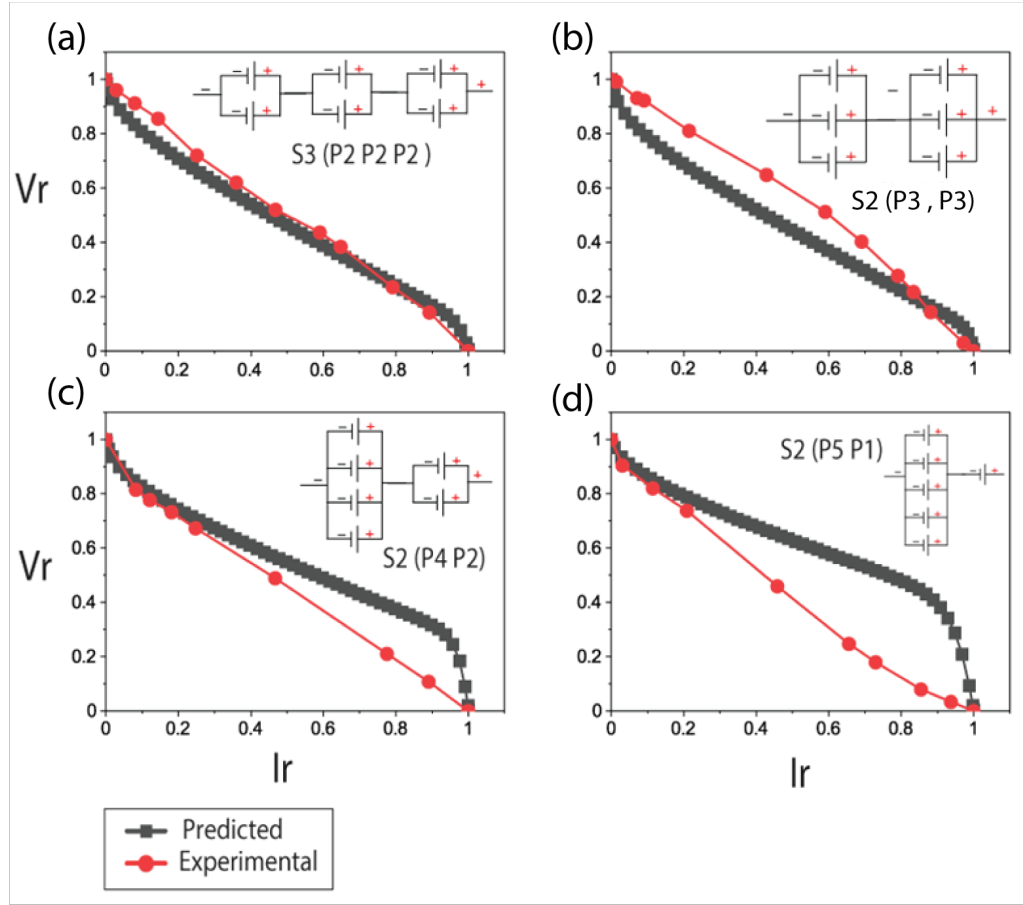

Figure S2: Normalized I-V characteristics of CC-2 configuration (a) [S2(P2, P2, P2)] configuration (b) [S2(P3, P3)] configuration (c) [S2(P4, P2)] configuration (d) [S2(P5, P1)] configuration. The red circles represent the experimental results; black squares represent the simulated (predicted values).

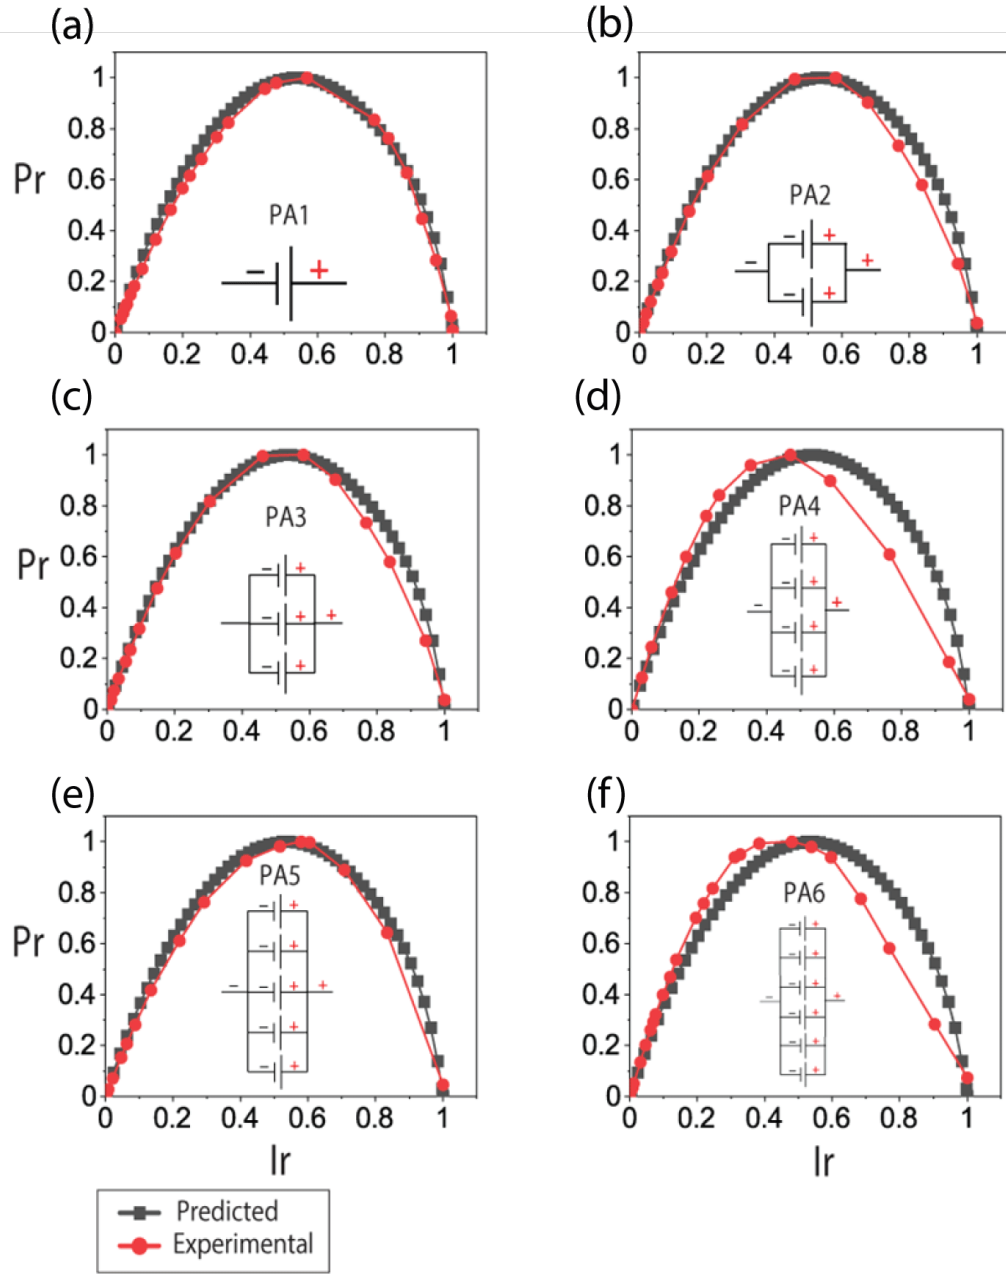

Figure S3: Normalized I-P characteristics of the PA6 configuration (a) PA1 configuration (b) PA2 configuration (c) PA3 configuration (d) PA4 configuration (e) PA5 configuration (f) PA6 configuration The red circles represent the experimental results; black squares represent the simulated (predicted values).

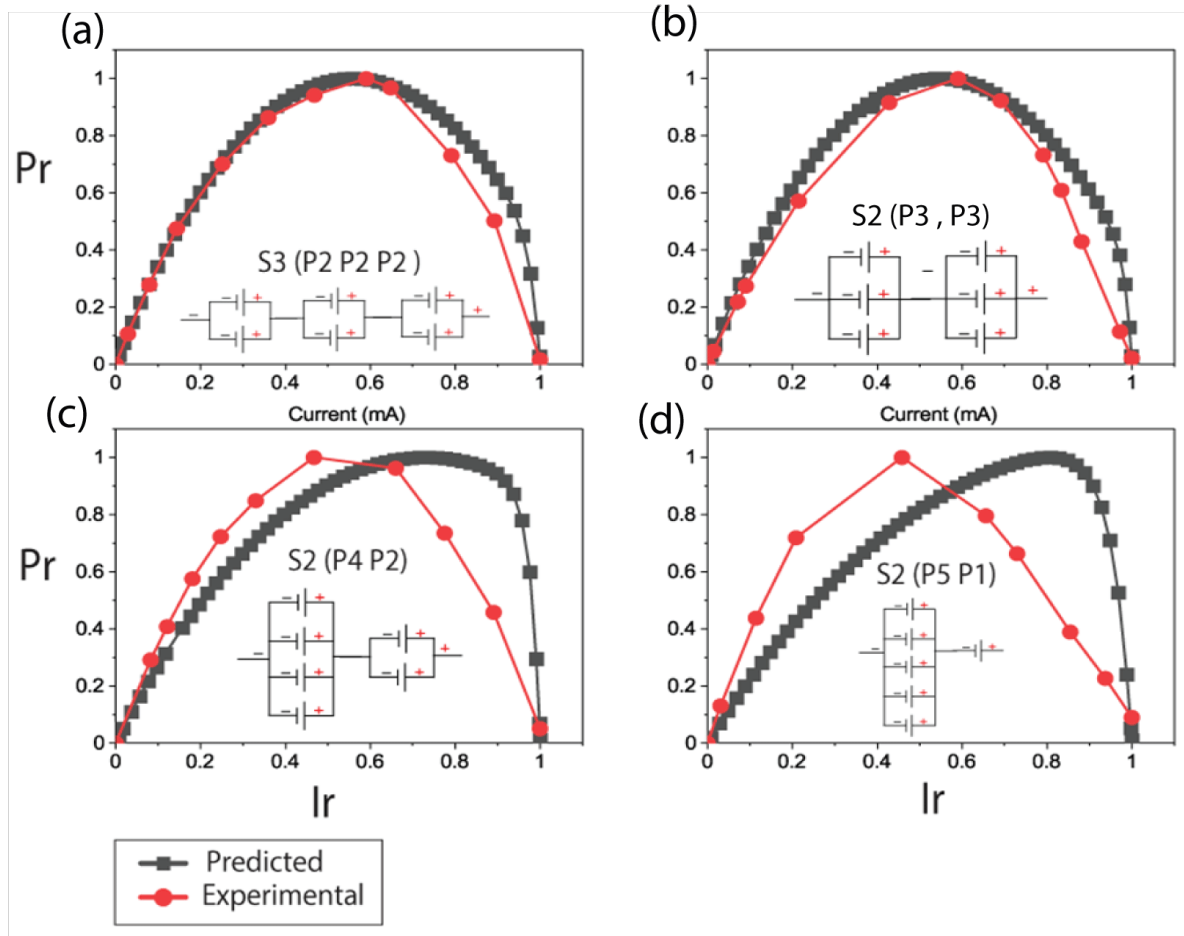

Figure S4: Normalized I-P characteristics of CC-2 configuration (a) [S2 (P2, P2, P2)] configuration (b) [S2 (P3, P3)] configuration (c) [S2 (P4, P2)] configuration (d) [S2 (P5, P1)] configuration. The red circles represented the experimental results; black squares represent the simulated (predicted values). All the scales are different to show the variation clearly.

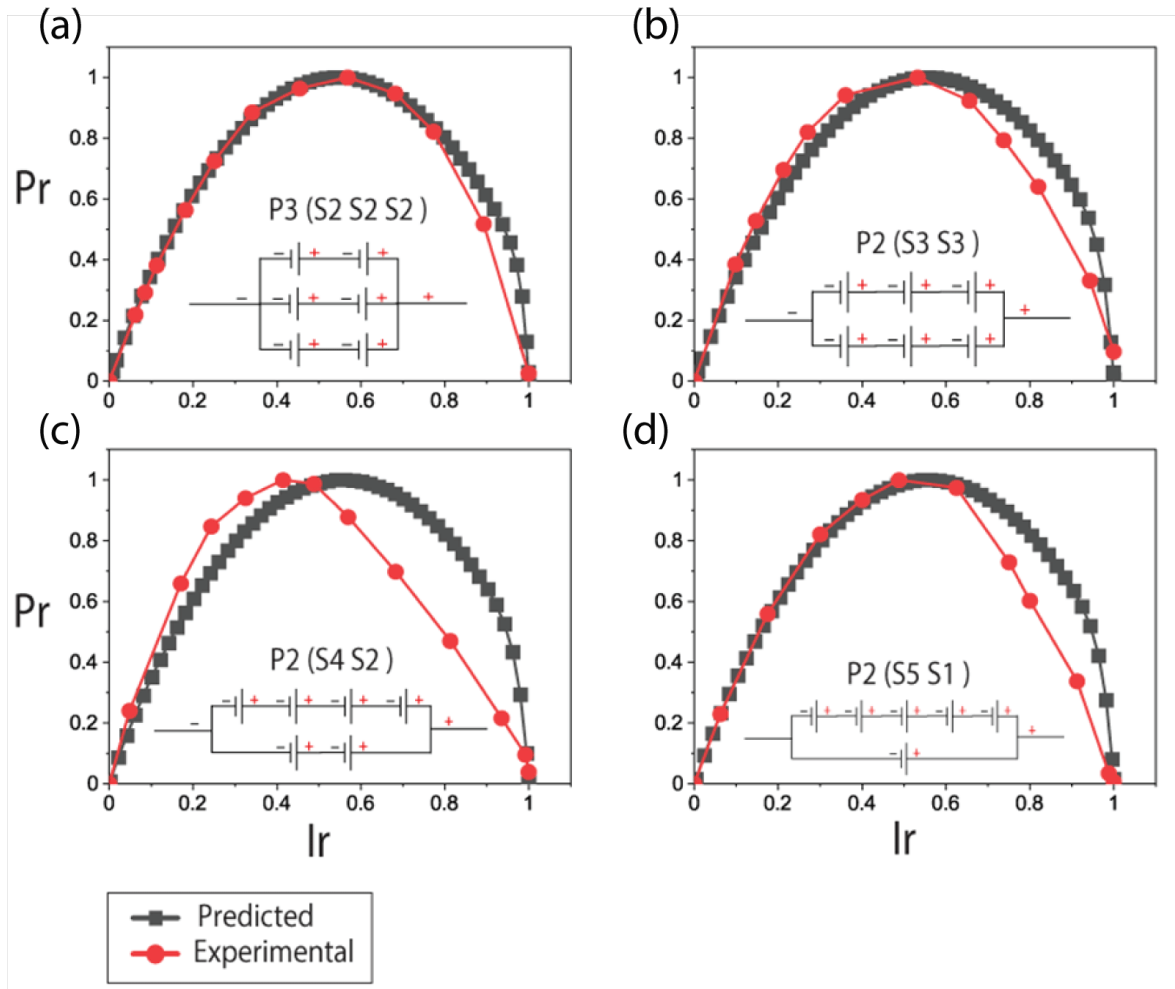

Figure S5: Normalized I-P characteristics of CC-1 configuration. (a) [P2 (S2, S2, S2)] configuration (b) [P2 (S3, S3)] configuration (c) [ P2 (S4, S2)] configuration (d) [P2 (S5, S1)] configuration. The red circles represent the experimental results; black squares represent the simulated (predicted values).

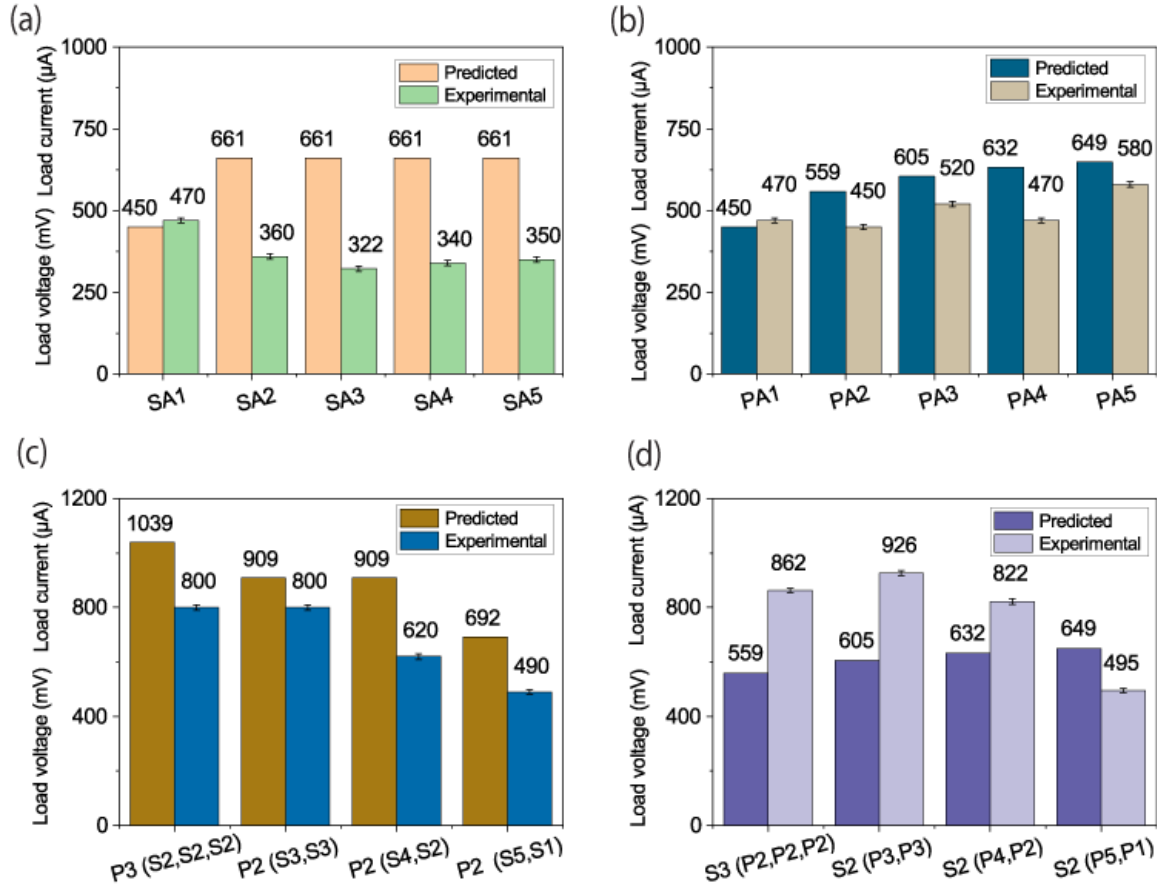

Figure S6: Variation of  $V_L$  of predicted and experimental results of all four array configurations.  
 (b) SA6 configuration (b) PA6 configuration (c) CC-1 configuration (d) CC-2 configuration

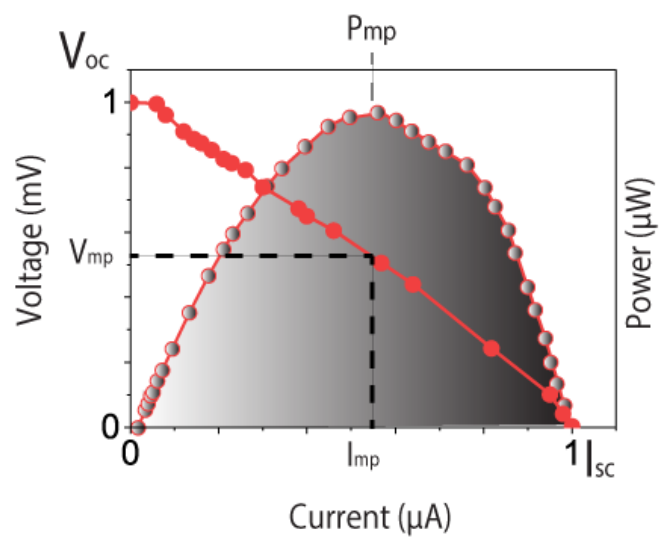

Figure S7. Fill factor of the  $\mu\text{PSC}$
